# Supplementary material for: Safety and Efficacy of Reduced Prolonged-release Tacrolimus Exposure in De Novo Kidney Transplantation: A Randomized, Open-label, Pilot Study in Asia—OPTIMIZE Study
Source: PubMed Central journal article supplement — Transplant Direct. 2019 Mar 25;5(4):e340. doi: 10.1097/TXD.0000000000000877 (PMC6445651; doi:10.1097/txd.0000000000000877), 2019-03-25
Supplement: txd-5-e340-s003.pdf [file txd-5-e340-s003.pdf]

## **SDC, Materials and Methods:** Exclusion Criteria at Screening and at Week 4.

---

### **Exclusion criteria at screening**

---

- Received an organ transplant other than a kidney
  - Received an organ from an HLA-identical donor
  - Cold ischemia time >24 hours
  - Received a graft from a non-heart-beating donor other than of Maastricht category 3
  - Significant liver disease, defined as having continuously elevated alanine aminotransferase and/or aspartate aminotransferase and/or total bilirubin levels  $\geq 2x$  ULN of the investigational site
  - Received a graft from a hepatitis C- or B-positive donor
  - Required on-going dosing with a systemic immunosuppressive drug prior to transplantation (eg, for Lupus disease, etc.) other than minimal levels of immunosuppressive following failure of a previous transplantation without nephrectomy
  - Significant, uncontrolled concomitant infections and/or severe diarrhea, vomiting, active upper gastro-intestinal tract malabsorption, or active peptic ulcer
  - Patient or donor HIV positive
  - Known allergy or intolerance to tacrolimus, macrolide antibiotics, steroids, lactose, basiliximab, MMF, or to any of the product excipients
  - Patient had malignant tumor (except patients who did not have a recurrence of malignant tumor  $\geq 5$  years before signing the informed consent form
-

- 
- Participating in another clinical study and/or had taken an investigational drug  $\leq 12$  weeks before signing the informed consent form
  - Any form of substance abuse, psychiatric disorder, or condition that, in the opinion of the investigator, could complicate communication with the investigator
  - Unlikely to comply with the visits scheduled in the protocol
  - Patient who had no plan to receive the induction therapy at transplantation
  - Expanded-criteria donor kidney (UNOS/OPTN)
  - Patient with a high immunologic risk, defined as:
    1. PRA level  $>50\%$  in the previous 52 weeks
    2. DSA positive before transplantation
    3. T and/or B cell cross-match positive before transplantation
    4. Previous graft loss  $<52$  weeks prior to current transplantation due to immunologic reasons

---

#### **Exclusion criteria at Week 4\***

---

- Did not receive basiliximab induction therapy at the time of transplantation
- Dose adjustment after Week 4 was contraindicated due to a recent rejection episode, such that treatment finished within 7 days
- Cold ischemia time  $>24$  hours
- Delayed graft function (patient required more than one dialysis treatment in the first week following transplantation)
- Pre-transplant DSA result was found to be positive

---

DSA, donor-specific antibody; HIV, human immunodeficiency virus; HLA, human leukocyte antigen; MMF, mycophenolate mofetil; OPTN, Organ Procurement and Transplantation

Network; PRA, panel reactive antibody; ULN, upper limit of normal; UNOS, United Network for Organ Sharing.

\*Patients were excluded from the study between Day 0 and Week 4 if one of the five exclusion criteria were present.
